# Supplementary material for: HIV-Infected Patients: Cross Site-Specific Hydrolysis of H3 and H4 Histones and Myelin Basic Protein with Antibodies against These Three Proteins
Source: PubMed Central journal article supplement (PMC7826842; doi:10.3390/molecules26020316), 2021-01-09
Supplement: molecules-26-00316-s001.pdf [file molecules-26-00316-s001.pdf]

# Supplementary Figure S1

## Homology of complete sequences of myelin basic protein and H3 histone

Waterman-Eggert score: 118; 11.7 bits; E(1) < 1  
26.4% identity (47.9% similar) in 163 aa overlap (30-170:2-129)

```
30      40      50      60      70      80
MBP  RHRDTGILDSLGRFFGSDRGAPKRGSGKD-GHHAARTTHYGS L P Q K A Q G --HRPQDENP-
      : . . . . : : : . : : : : . . . . : : : : : : . . . . :
H3   RTKQTA-RKSTG---G--K-AP-R---KQLATKAAR--K--SAP--ATGGVKKPHRYRPG
      10      20      30      40

90      100     110     120     130
MBP  VVHFFKNIIVTPRTPPPSQGKGRGLSLSR---FSWGA-E-GQKPGFGYGGGRASD--YKS-A
      . : . . . : : : : : : : . . : : : : : . . : . . : :
H3   TVAL-REI---RR---YQ-KSTEL-LIRKLPFQRLVREIAQ--DF----K-TDLRFQSSA
      50      60      70      80

140     150     160     170
MBP  HKGLKGHDA-QGTLISKIFK---LGG-RDSR-SGSP----MARR
      . . . . : : . . : . . . : : . . . . : : . . . . :
H3   VMALQ--EACEAYLVGLFEDTNLCAIHAKRVTIMPKDIQLARR
      90      100     110     120
```

## Homology of complete sequences of myelin basic protein and H4 histone

>>H4 102 bp (102 aa)  
Waterman-Eggert score: 107; 13.9 bits; E(1) < 0.68  
30.0% identity (45.0% similar) in 140 aa overlap (39-158:1-102)

```
40      50      60      70      80      90
MBP  SLGRFFGSDRGAPKRGSGKDGHHAARTTHYGS L P Q K A Q G H R P Q D E N P V V H F F K N I V T P R T
      : : : : . . . : : : : : : : : . . . : : : : . . . : :
H4   S-GR--G--KGG-K-GLGKGG--AKR--H-----RKVL--R--D-N-I----QGI-T-K-
      10      20      30

100     110     120     130     140
MBP  P P P S Q - G K G R G L S L S R F S W G --- A E -- G - Q K P G F G Y G G -- R - A S D Y K S A H --- K G L K G H D
      : . . . . : : . . . . : : : : : : : . : : : : . : : : : : : : : : :
H4   P A I R R L A R - R G - G V K R I S - G L I Y E E T R G V L K V - F - L E N V I R D A V T Y - T E H A K R K T V T A M D
      40      50      60      70      80

150
MBP  ---A---OG-TLSKIFKLGG
```

Homology of complete sequences of histones and myelin basic protein was estimated using:

[http://www.ch.embnet.org/software/LALIGN\\_form.html](http://www.ch.embnet.org/software/LALIGN_form.html)
